# Supplementary material for: Core–shell materials bearing iron(ii) carbonyl units and their CO-release via an upconversion process
Source: Royal Society of Chemistry journal article supplement (doi:10.1039/c7tb01434a), 2017-01-01
Supplement: c7tb01434a1.pdf [file c7tb01434a1.pdf]

## Electronic Supplementary Information

### **Core-shell materials bearing iron (II) carbonyl units and their CO-release *via* upconversion process**

Jun Ou<sup>a</sup>, Weihua Zheng<sup>a</sup>, Zhiyin Xiao<sup>b</sup>, Yuping Yan<sup>b</sup>, Xiujuan Jiang<sup>b</sup>, Yong Dou<sup>a</sup>,  
Ran Jiang<sup>c</sup>, Xiaoming Liu<sup>b,\*</sup>

<sup>a</sup>College of Materials Science and Engineering, Key Laboratory of New Processing Technology for Nonferrous Materials (Ministry of Education), Collaborative Innovation Center for Exploration of Hidden Nonferrous Metal Deposits and Development of New Materials in Guangxi, Guilin University of Technology, Guilin, Guangxi 514000, China.

<sup>b</sup>College of Biological, Chemical Sciences and Engineering, Jiaxing University, Jiaxing, Zhejiang 314001, China.

<sup>c</sup>College of chemistry and life sciences, Zhejiang normal university, Jinhua, Zhejiang 321004, China.

Tel./Fax: +86(0)573 83643937

\*E-mail: [xiaoming.liu@mail.zjxu.edu.cn](mailto:xiaoming.liu@mail.zjxu.edu.cn)

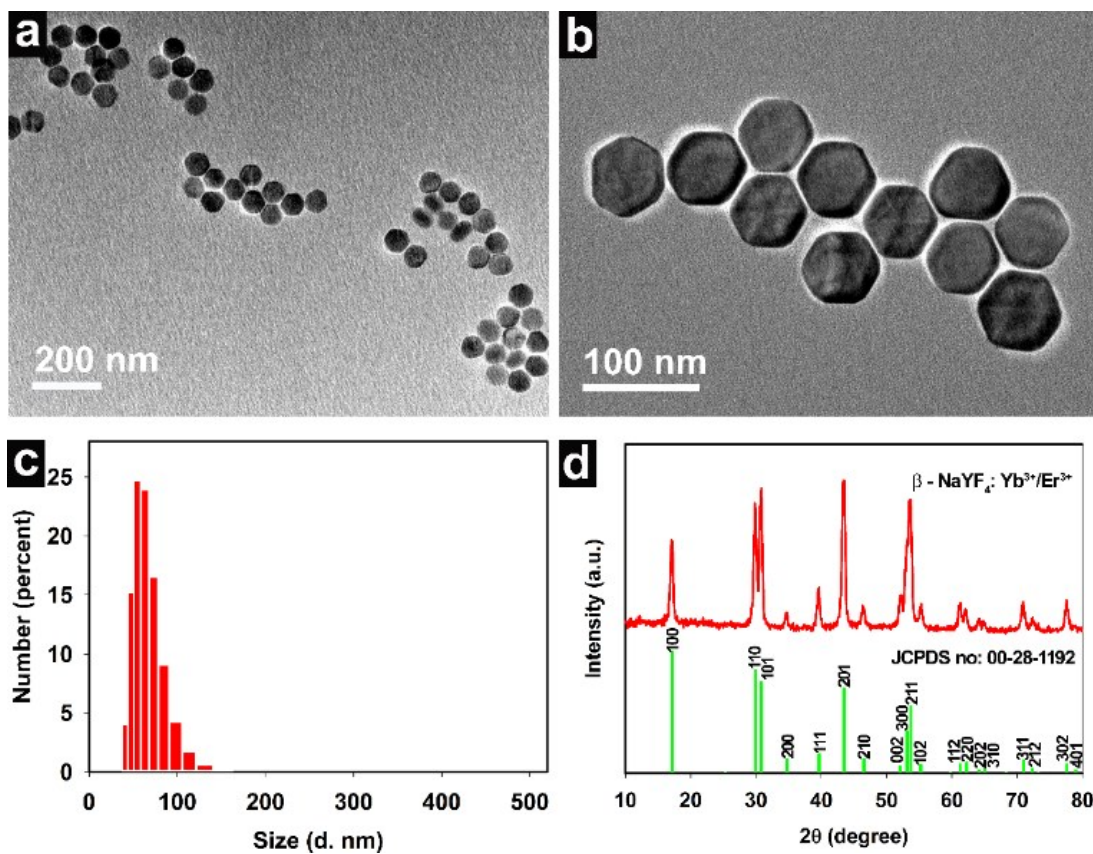

**Fig. S1** Characterizations of  $\beta$ -NaYF<sub>4</sub>:Yb<sup>3+</sup>/Er<sup>3+</sup> UCNPs: (a) and (b) TEM images, (c) hydrodynamic diameter distribution in cyclohexane, (d) X-ray diffraction pattern (A JCPDS file of standard  $\beta$ -NaYF<sub>4</sub>:Yb<sup>3+</sup>/Er<sup>3+</sup> powder is given as a reference).

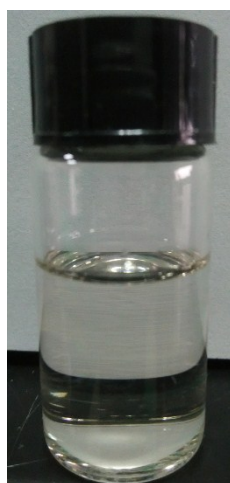

**Fig. S2** Photograph of UCNPs which was dispersed in cyclohexane.

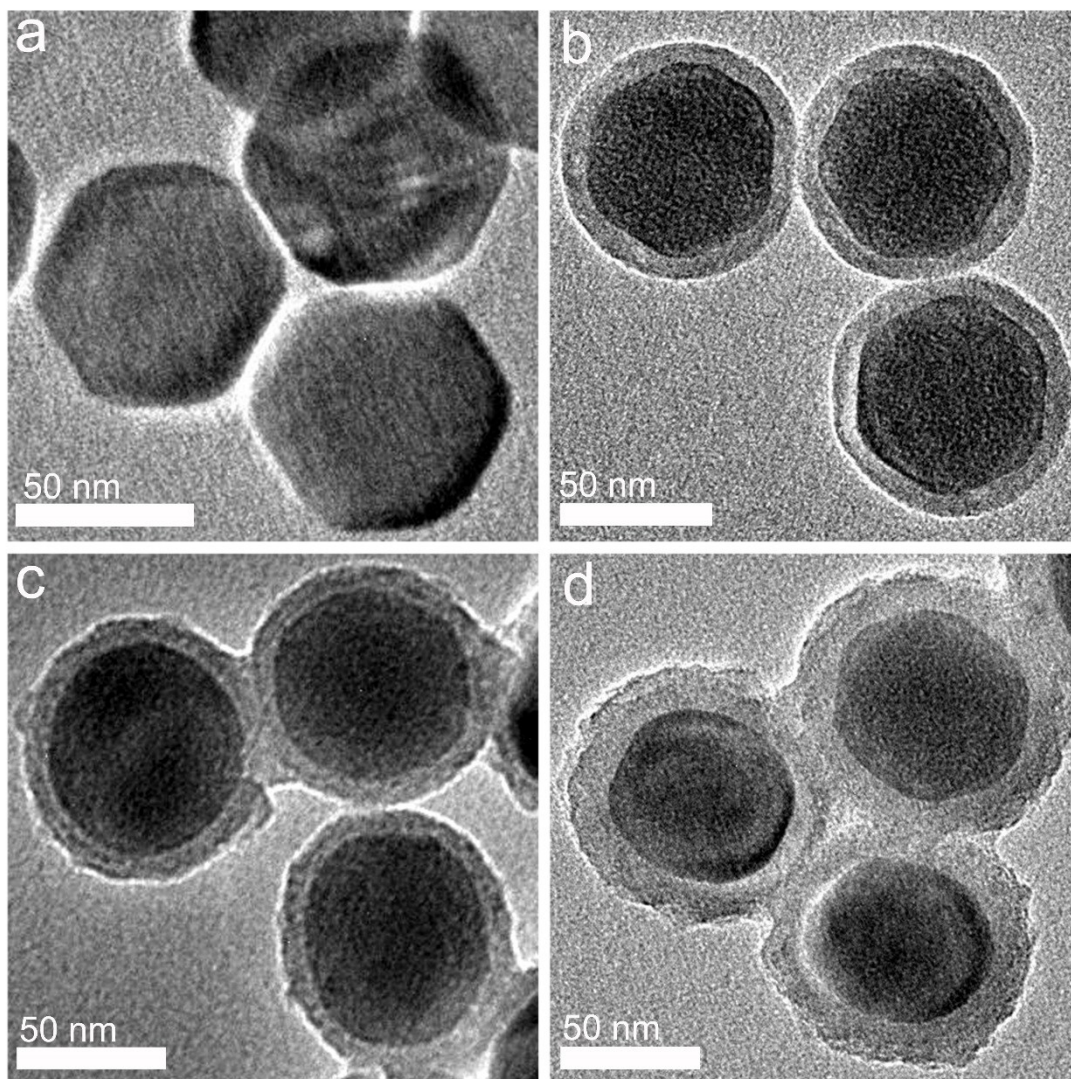

**Fig. S3** Magnification TEM images of the nanoparticles at different stages of the one-pot formation reaction: (a) UCNPs, (b) UCNPs@SiO<sub>2</sub>, (c) UCNPs@SiO<sub>2</sub>-SH, (d) UCNPs@SiO<sub>2</sub>-CORMs.

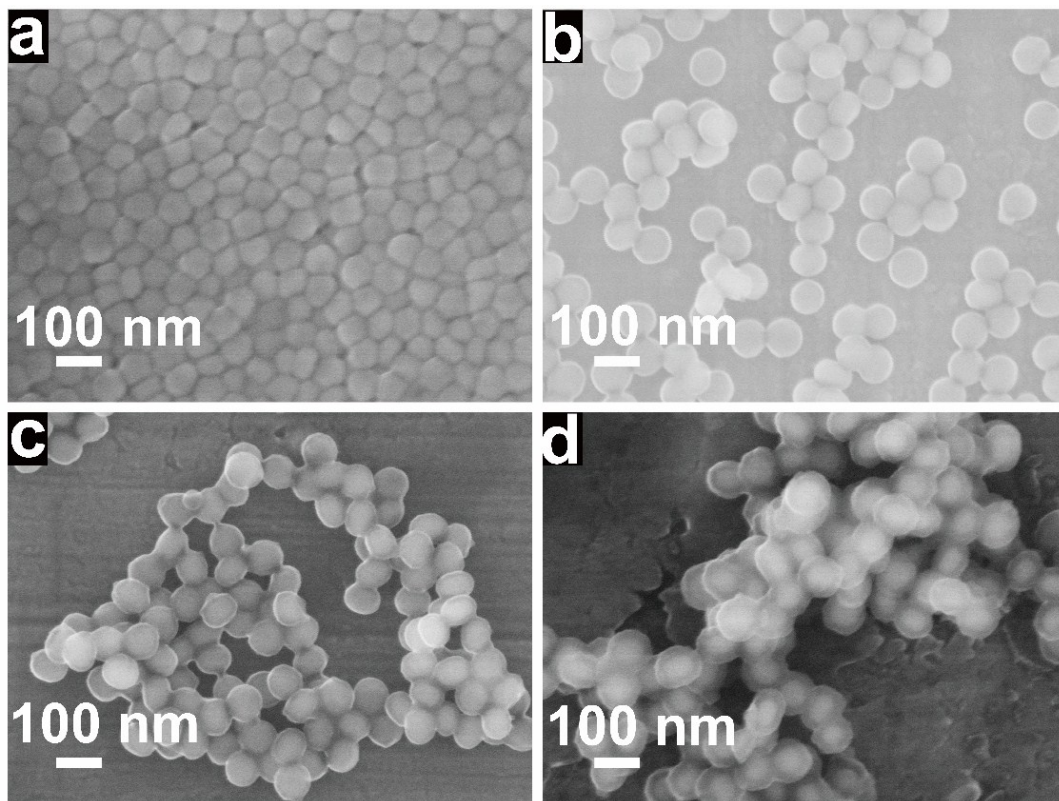

**Fig. S4** SEM images of UCNPs (a), UCNPs@SiO<sub>2</sub> (b), UCNPs@SiO<sub>2</sub>-SH (c), UCNPs@SiO<sub>2</sub>-CORMs (d).

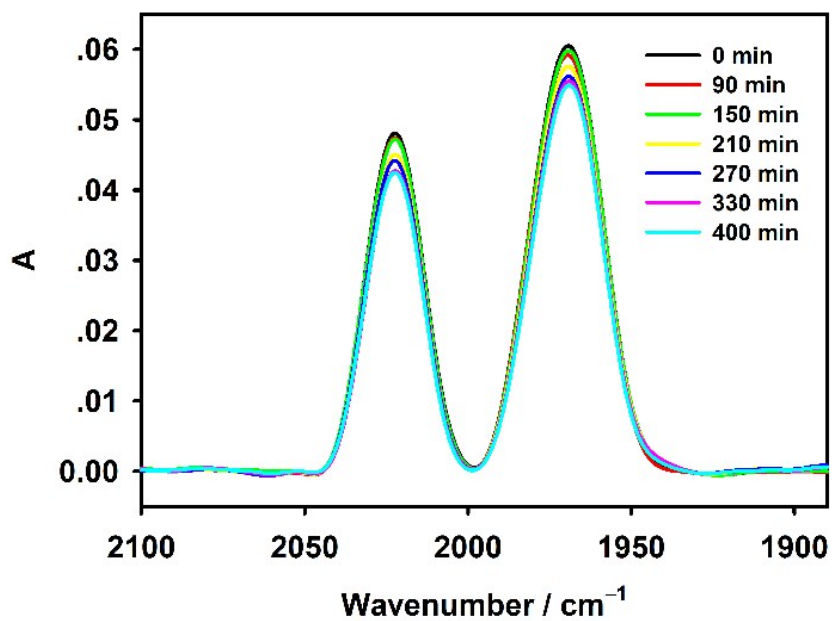

**Fig. S5** Infrared spectral variation in DMSO / D<sub>2</sub>O (1:1) in dark.



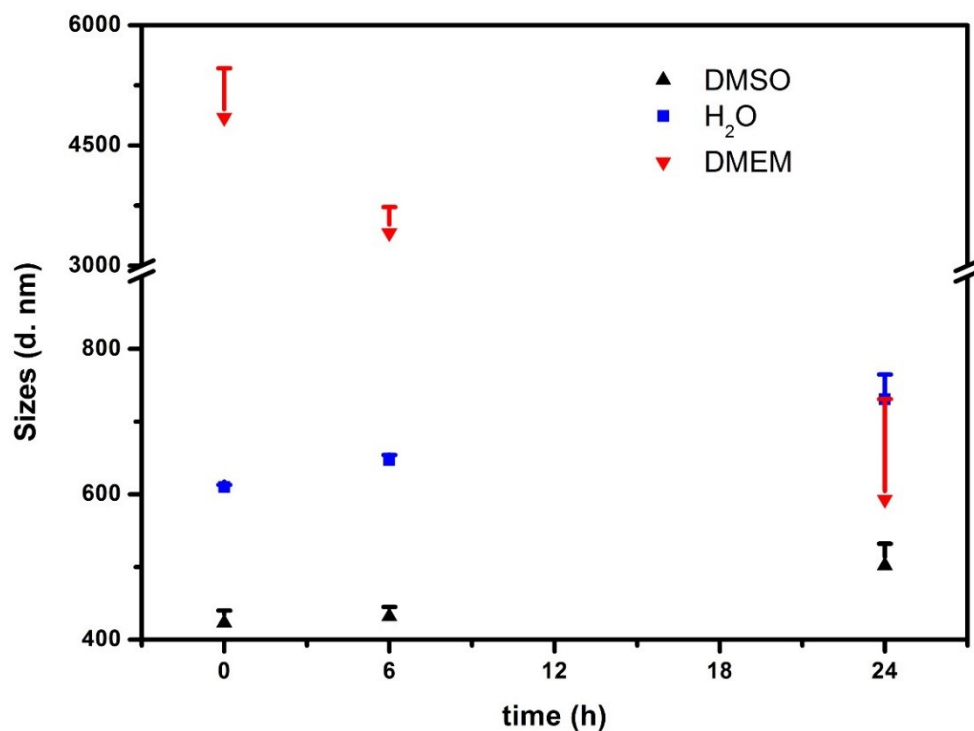

**Fig. S6** Diameter sizes of the UCNPs@SiO<sub>2</sub>-CORMs nanomaterials determined by dynamic light scattering test in different media within 24 h. For the water medium and DMEM, 10% of DMSO was added to disperse the materials.

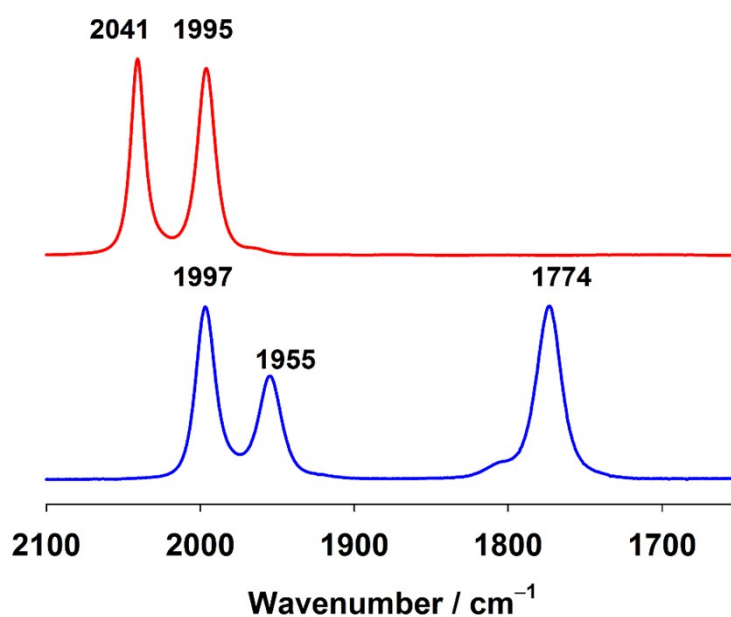

**Fig. S7** FTIR spectra of  $[(\eta^5\text{-Cp})\text{Fe}(\mu\text{-CO})(\text{CO})_2]$  (blue) and complex **1** (red) in CH<sub>2</sub>Cl<sub>2</sub>

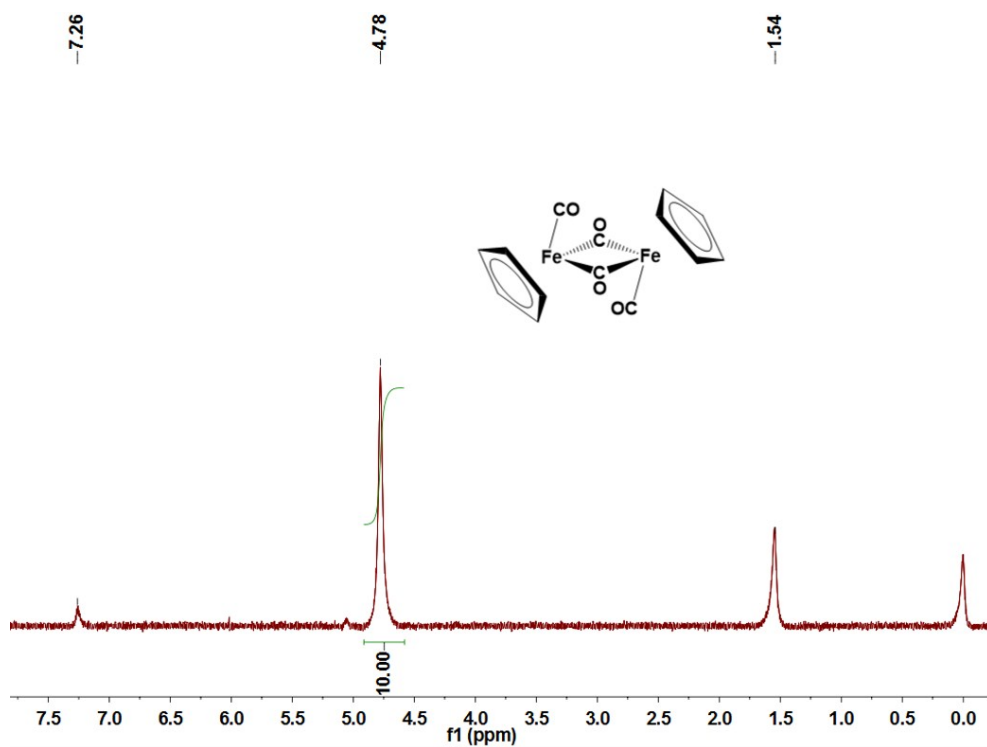

**Fig. S8**  $^1\text{H}$  NMR spectrum of  $[(\eta^5\text{-Cp})\text{Fe}(\mu\text{-CO})(\text{CO})]_2$  in  $\text{CDCl}_3$

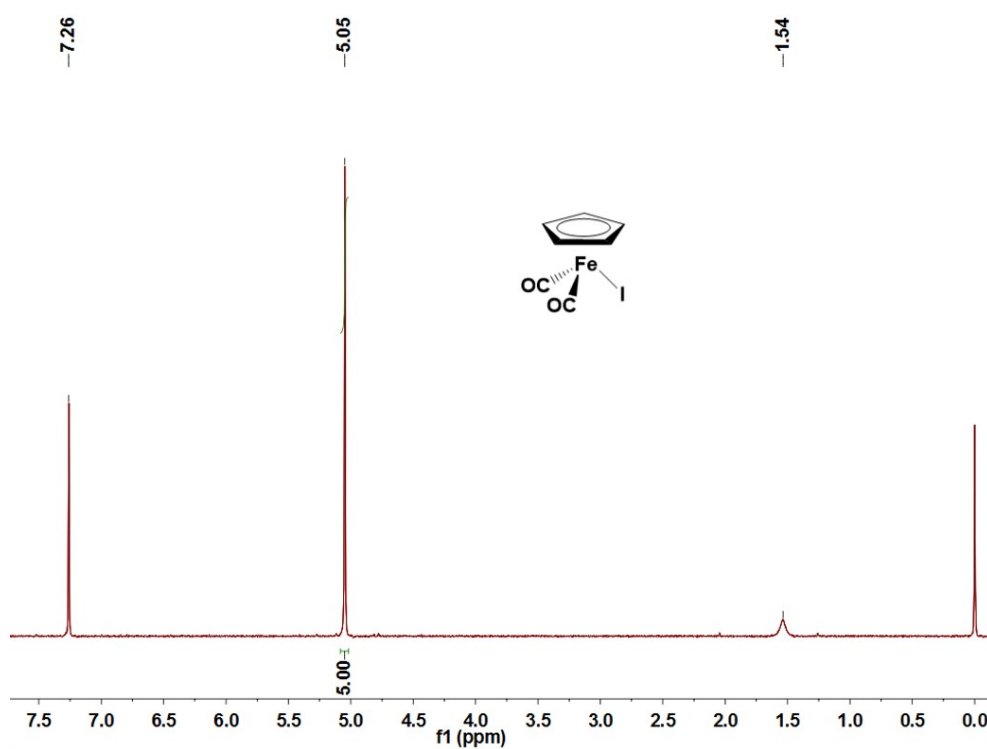

**Fig. S9**  $^1\text{H}$  NMR spectrum of complex **1** in  $\text{CDCl}_3$

**Table S1.** Particle size distribution of UCNPs (**1**), UCNPs@SiO<sub>2</sub> (**2**), UCNPs@SiO<sub>2</sub>-SH (**3**), UCNPs@SiO<sub>2</sub>-CORMs (**4**) in ethanol solvent.

|                      | <b>1</b> | <b>2</b> | <b>3</b> | <b>4</b> |
|----------------------|----------|----------|----------|----------|
| <b>Diameter / nm</b> | 66 nm    | 89 nm    | 104 nm   | 119 nm   |
